# Supplementary material for: Titanium complexes of pyrrolylaldiminate ligands and their exploitation for the ring-opening polymerization of cyclic esters
Source: Royal Society of Chemistry journal article supplement (doi:10.1039/d1dt01470f), 2021-01-01
Supplement: d1dt01470f1.pdf [file d1dt01470f1.pdf]

## Electronic Supplementary Information

# Titanium Complexes of Pyrrolyaldiminate Ligands and Their Exploitation for the Ring-Opening Polymerization of Cyclic Esters

*Kanokon Upitak,<sup>a</sup> Worawat Wattanathana,<sup>b</sup> Tanin Nanok,<sup>a</sup> Pitak Chuawong,<sup>a</sup>  
Pimpa Hormnirun<sup>\*a</sup>*

<sup>a</sup>Laboratory of Catalysts and Advanced Polymer Materials, Department of Chemistry and Center of Excellence for Innovation in Chemistry, Faculty of Science, Kasetsart University, Bangkok 10900, Thailand

<sup>b</sup>Department of Materials Engineering, Faculty of Engineering, Kasetsart University, Bangkok 10900, Thailand.

\*E-mail: fscipph@ku.ac.th

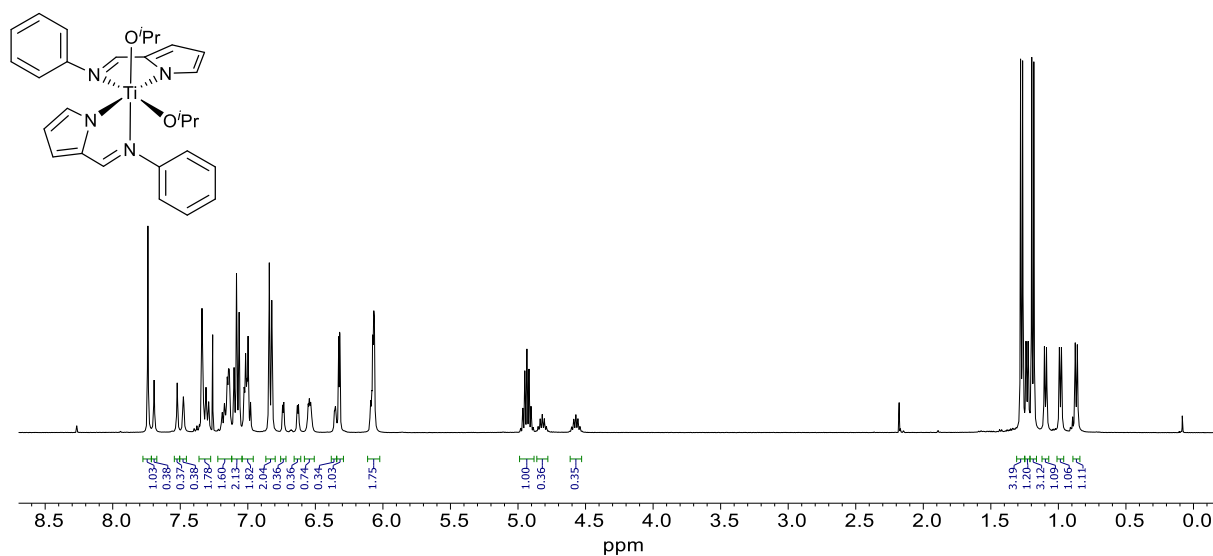

**Fig. S1**  $^1\text{H}$  NMR spectrum of **1** in  $\text{CDCl}_3$  at 298 K.

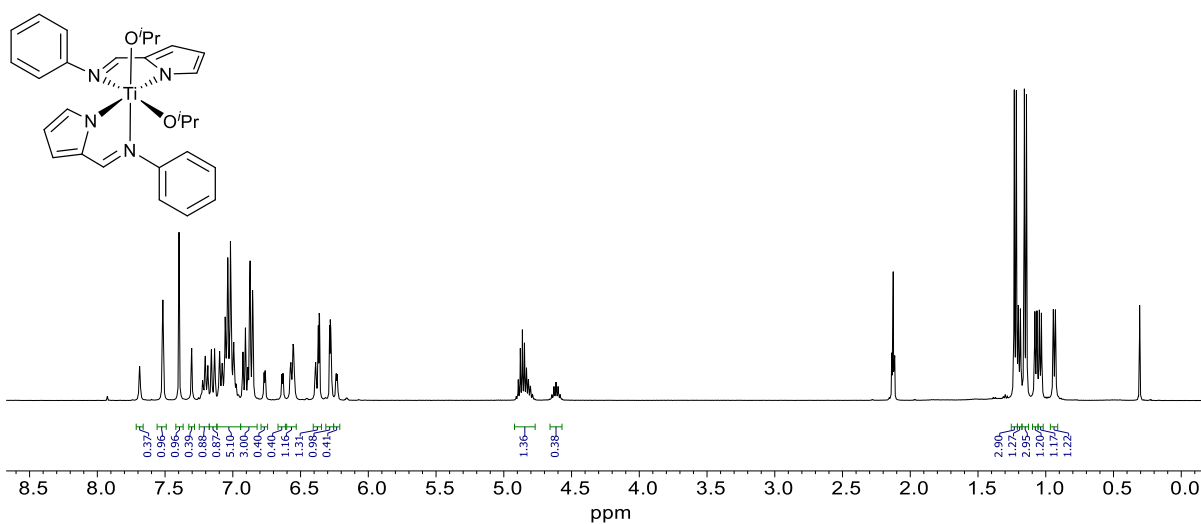

**Fig. S2**  $^1\text{H}$  NMR spectrum of **1** in  $\text{toluene-d}_8$  at 298 K.

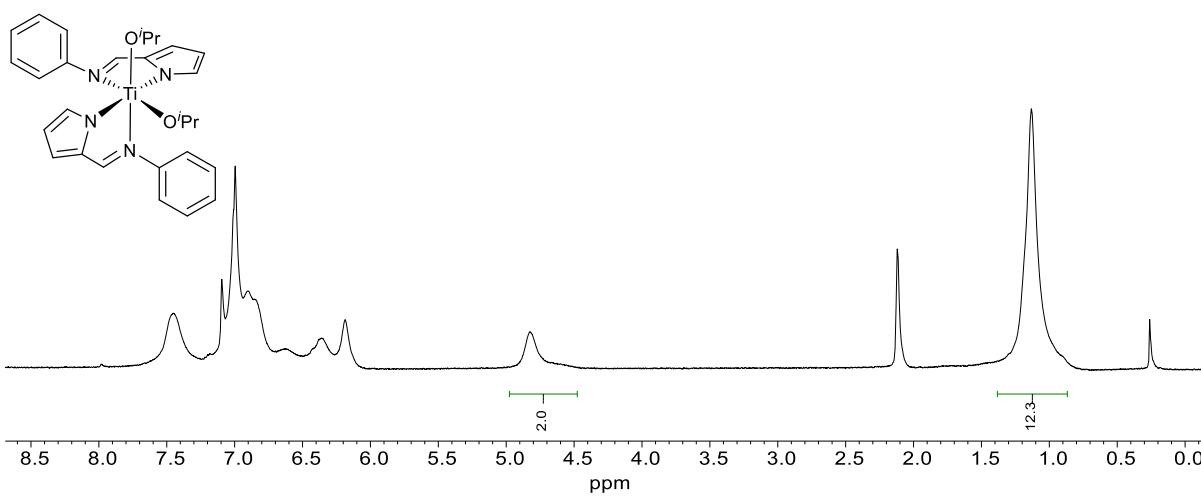

**Fig. S3**  $^1\text{H}$  NMR spectrum of **1** in  $\text{toluene-d}_8$  at 363 K.

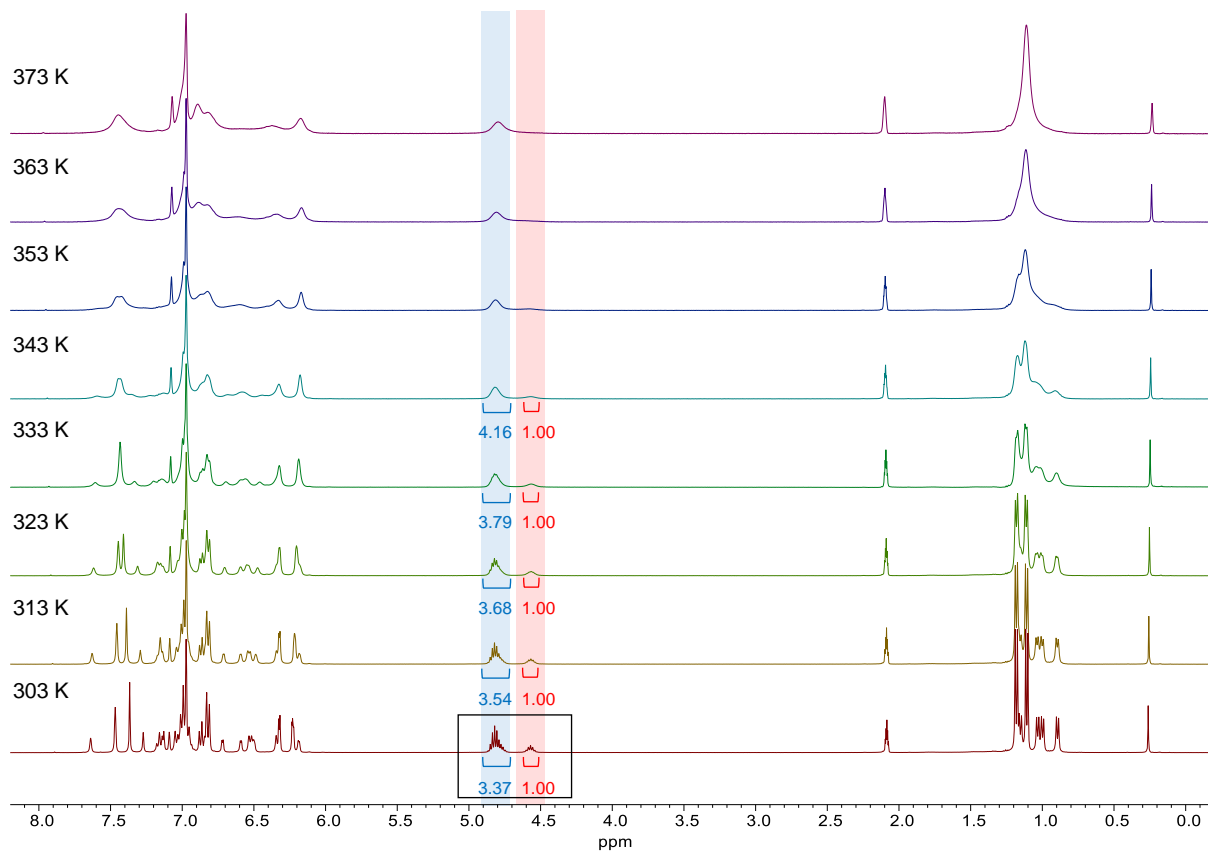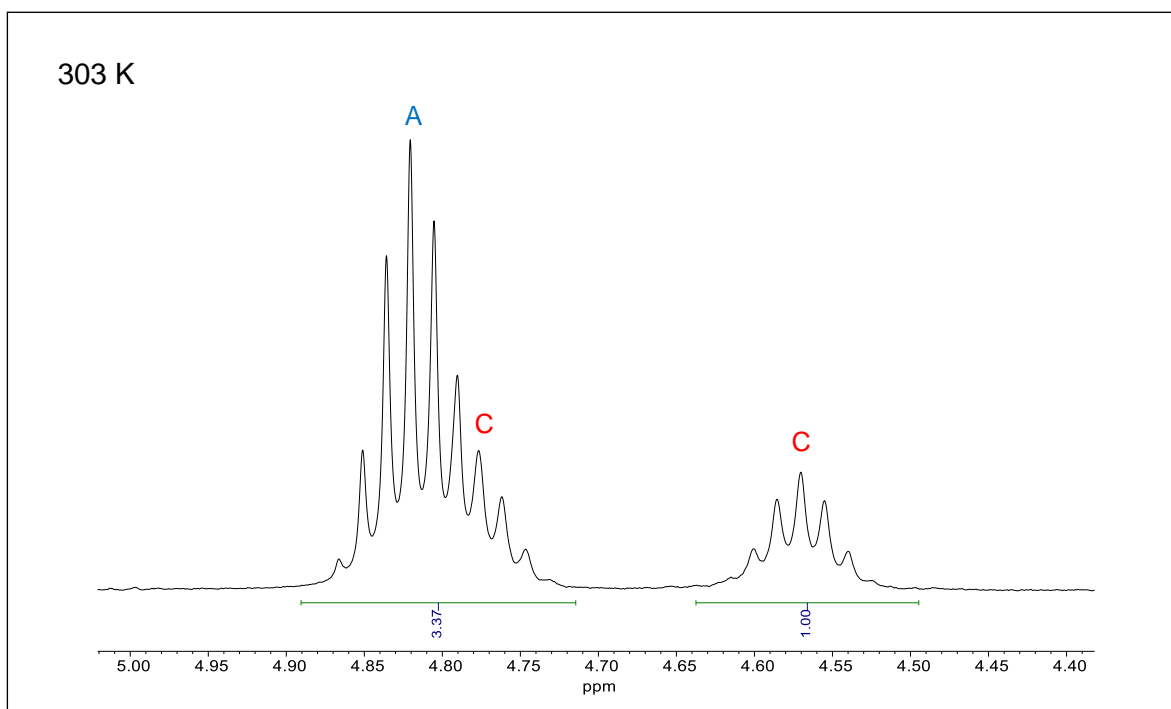

**Fig. S4**  $^1\text{H}$  NMR spectra of **1** in toluene- $d_8$  at different temperatures.

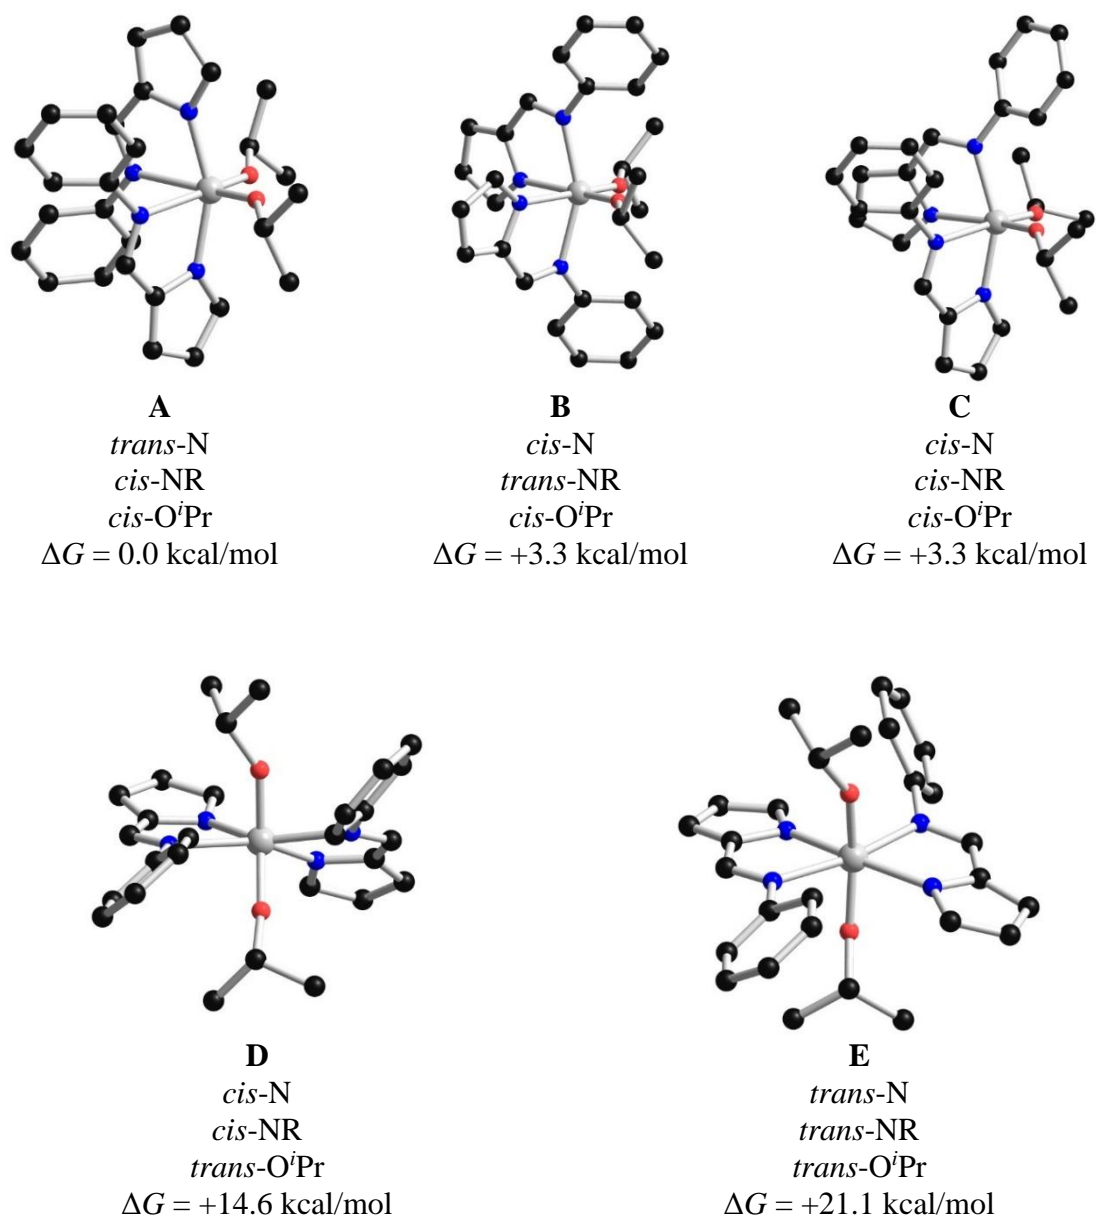

**Fig. S5** Relative free energies of five possible stereoisomers of complex **1** calculated using the SMD(toluene)/M062X method with the 6-311+G(d,p) basis set for nonmetal atoms and the def2-tzvpp for Ti.

Cartesian coordinates of five possible stereoisomers of complex **1**

| A  |         |         | B       |    |           | C         |           |    |         |         |         |
|----|---------|---------|---------|----|-----------|-----------|-----------|----|---------|---------|---------|
| Ti | -0.3211 | -0.6790 | -1.2592 | Ti | -0.609668 | -0.740380 | 0.417992  | Ti | -0.2013 | -0.8132 | -1.2476 |
| N  | -2.3716 | -0.3447 | -1.0908 | N  | -0.624811 | -1.085510 | -1.726669 | N  | -2.1922 | -0.2427 | -1.0874 |
| C  | -2.8582 | 0.0982  | 0.1175  | C  | -0.421916 | -2.407275 | -2.059597 | C  | -2.6230 | 0.2207  | 0.1355  |
| C  | -3.4298 | -0.4858 | -1.9125 | C  | -0.838709 | -0.429868 | -2.869203 | C  | -3.2448 | -0.1936 | -1.9249 |
| C  | -4.2454 | 0.2444  | 0.0496  | C  | -0.512607 | -2.573579 | -3.453904 | C  | -3.9755 | 0.5642  | 0.0612  |
| C  | -4.6105 | -0.1332 | -1.2519 | C  | -0.779312 | -1.308450 | -3.971667 | C  | -4.3729 | 0.2984  | -1.2579 |
| H  | -3.2984 | -0.8304 | -2.9290 | H  | -1.031664 | 0.635159  | -2.870038 | H  | -3.1493 | -0.5167 | -2.9521 |
| H  | -4.8933 | 0.5786  | 0.8466  | H  | -0.396720 | -3.500898 | -3.995852 | H  | -4.5802 | 0.9572  | 0.8653  |
| H  | -5.6047 | -0.1517 | -1.6717 | H  | -0.914641 | -1.039440 | -5.008195 | H  | -5.3540 | 0.4383  | -1.6860 |
| N  | 1.6995  | -0.3207 | -0.9101 | N  | 1.523914  | -0.584347 | 0.024734  | N  | 0.0987  | 1.3305  | -1.3410 |
| C  | 2.1261  | 0.9853  | -0.8450 | C  | 1.914424  | 0.685142  | -0.341978 | C  | 1.3605  | 1.7266  | -0.9497 |
| C  | 2.7900  | -1.0987 | -0.7688 | C  | 2.634565  | -1.321408 | 0.096614  | C  | -0.6503 | 2.4355  | -1.4019 |
| C  | 3.5086  | 1.0269  | -0.6515 | C  | 3.311014  | 0.734001  | -0.504604 | C  | 1.3974  | 3.1209  | -0.7752 |
| C  | 3.9329  | -0.3103 | -0.6053 | C  | 3.771663  | -0.550201 | -0.224579 | C  | 0.1119  | 3.5745  | -1.0676 |
| H  | 2.7055  | -2.1766 | -0.7909 | H  | 2.592499  | -2.366038 | 0.376935  | H  | -1.6974 | 2.3829  | -1.6732 |
| H  | 4.1151  | 1.9162  | -0.5615 | H  | 3.892653  | 1.599362  | -0.787871 | H  | 2.2559  | 3.7059  | -0.4781 |
| H  | 4.9413  | -0.6711 | -0.4709 | H  | 4.792693  | -0.899960 | -0.245204 | H  | -0.2418 | 4.5944  | -1.0562 |
| C  | -1.9045 | 0.2815  | 1.1560  | C  | -0.231068 | -3.310541 | -0.994741 | C  | -1.6538 | 0.2849  | 1.1775  |
| H  | -2.2204 | 0.6538  | 2.1313  | H  | -0.072249 | -4.370806 | -1.191645 | H  | -1.9268 | 0.6775  | 2.1581  |
| C  | 1.1306  | 1.9860  | -1.0181 | C  | 0.903299  | 1.663508  | -0.422924 | C  | 2.3226  | 0.7107  | -0.8060 |
| H  | 1.3962  | 3.0418  | -0.9550 | H  | 1.148516  | 2.689729  | -0.696864 | H  | 3.3485  | 0.9676  | -0.5460 |
| C  | -1.1083 | 2.5830  | -1.3697 | C  | -1.352527 | 2.311205  | -0.211212 | C  | 2.9905  | -1.5218 | -1.0954 |
| C  | -2.0697 | 2.4495  | -2.3745 | C  | -2.295114 | 2.390319  | 0.816253  | C  | 2.7202  | -2.8436 | -0.7335 |
| C  | -1.1963 | 3.6472  | -0.4683 | C  | -1.444757 | 3.174470  | -1.305736 | C  | 4.2586  | -1.2074 | -1.6019 |
| C  | -3.0947 | 3.3783  | -2.4848 | C  | -3.306661 | 3.339548  | 0.754813  | C  | 3.7084  | -3.8157 | -0.8255 |
| H  | -2.0016 | 1.6123  | -3.0589 | H  | -2.224768 | 1.700545  | 1.650294  | H  | 1.7259  | -3.1014 | -0.3982 |
| C  | -2.2263 | 4.5753  | -0.5860 | C  | -2.465280 | 4.117595  | -1.362095 | C  | 5.2434  | -2.1840 | -1.6856 |
| H  | -0.4698 | 3.7333  | 0.3328  | H  | -0.730822 | 3.089285  | -2.118099 | H  | 4.4670  | -0.2092 | -1.9684 |
| C  | -3.1777 | 4.4446  | -1.5921 | C  | -3.396655 | 4.206053  | -0.332340 | C  | 4.9791  | -3.4914 | -1.2901 |
| H  | -3.8365 | 3.2648  | -3.2669 | H  | -4.032208 | 3.400239  | 1.557998  | H  | 3.4774  | -4.8352 | -0.5370 |
| H  | -2.2910 | 5.3951  | 0.1203  | H  | -2.534779 | 4.778939  | -2.218116 | H  | 6.2178  | -1.9217 | -2.0819 |
| H  | -3.9833 | 5.1642  | -1.6763 | H  | -4.192236 | 4.940136  | -0.380479 | H  | 5.7471  | -4.2518 | -1.3662 |
| C  | 0.3148  | 0.2250  | 1.9084  | C  | -0.062154 | -3.757537 | 1.316030  | C  | 0.5598  | 0.0059  | 1.9043  |
| C  | 1.3063  | -0.7346 | 2.1262  | C  | -0.902707 | -3.687729 | 2.429258  | C  | 1.4231  | -1.0666 | 2.1375  |
| C  | 0.3335  | 1.4144  | 2.6418  | C  | 0.988658  | -4.677660 | 1.297261  | C  | 0.7540  | 1.2123  | 2.5797  |
| C  | 2.2950  | -0.5120 | 3.0740  | C  | -0.705844 | -4.550179 | 3.499660  | C  | 2.4551  | -0.9410 | 3.0580  |
| H  | 1.2904  | -1.6472 | 1.5424  | H  | -1.700557 | -2.953170 | 2.443215  | H  | 1.2742  | -1.9895 | 1.5877  |
| C  | 1.3262  | 1.6292  | 3.5934  | C  | 1.182650  | -5.532919 | 2.376679  | C  | 1.7892  | 1.3308  | 3.5014  |
| H  | -0.4168 | 2.1746  | 2.4514  | H  | 1.662477  | -4.706960 | 0.447651  | H  | 0.1199  | 2.0613  | 2.3467  |
| C  | 2.3099  | 0.6703  | 3.8109  | C  | 0.336535  | -5.474077 | 3.479292  | C  | 2.6403  | 0.2573  | 3.7450  |
| H  | 3.0611  | -1.2623 | 3.2322  | H  | -1.365840 | -4.496163 | 4.357941  | H  | 3.1199  | -1.7786 | 3.2356  |
| H  | 1.3368  | 2.5559  | 4.1556  | H  | 2.004889  | -6.238928 | 2.357399  | H  | 1.9398  | 2.2724  | 4.0169  |
| H  | 3.0874  | 0.8440  | 4.5454  | H  | 0.492708  | -6.139389 | 4.320027  | H  | 3.4496  | 0.3563  | 4.4586  |
| N  | -0.0848 | 1.6107  | -1.2718 | N  | -0.327339 | 1.336148  | -0.127944 | N  | 1.9723  | -0.5386 | -0.9945 |
| N  | -0.6661 | -0.0229 | 0.9187  | N  | -0.277267 | -2.866955 | 0.234337  | N  | -0.4545 | -0.1339 | 0.9296  |
| O  | -0.2324 | -0.7021 | -3.0359 | O  | -0.260636 | -0.521642 | 2.154969  | O  | -0.1941 | -1.0275 | -3.0070 |
| O  | -0.3342 | -2.3906 | -0.7726 | O  | -2.393213 | -0.822888 | 0.402755  | O  | -0.4397 | -2.4762 | -0.6194 |
| C  | 0.2335  | 0.0293  | -4.1569 | C  | 0.752071  | -0.131294 | 3.065668  | C  | -0.1338 | -0.3074 | -4.2275 |
| C  | 1.6870  | -0.3363 | -4.4200 | C  | 1.020458  | -1.268448 | 4.038851  | C  | 1.2973  | 0.1466  | -4.4718 |
| C  | -0.6667 | -0.2719 | -5.3445 | C  | 0.305861  | 1.145854  | 3.761247  | C  | -0.6569 | -1.1985 | -5.3428 |
| H  | 0.1723  | 1.0991  | -3.9161 | H  | 1.666473  | 0.070687  | 2.493174  | H  | -0.7788 | 0.5751  | -4.1265 |
| H  | 2.3062  | -0.1043 | -3.5500 | H  | 1.342112  | -2.165419 | 3.503790  | H  | 1.6280  | 0.8087  | -3.6687 |
| H  | 2.0683  | 0.2223  | -5.2787 | H  | 1.807509  | -0.981972 | 4.741399  | H  | 1.3671  | 0.6894  | -5.4179 |
| H  | 1.7712  | -1.4055 | -4.6323 | H  | 0.115813  | -1.508442 | 4.604469  | H  | 1.9628  | -0.7203 | -4.5155 |
| H  | -1.7027 | -0.0051 | -5.1217 | H  | 0.126902  | 1.934851  | 3.026371  | H  | -1.6719 | -1.5360 | -5.1228 |
| H  | -0.6286 | -1.3383 | -5.5825 | H  | -0.618946 | 0.970346  | 4.317937  | H  | -0.0173 | -2.0783 | -5.4505 |
| H  | -0.3458 | 0.2949  | -6.2220 | H  | 1.073699  | 1.491623  | 4.457984  | H  | -0.6692 | -0.6551 | -6.2908 |
| C  | -0.7956 | -3.2718 | 0.2370  | C  | -3.506269 | -1.187704 | -0.394163 | C  | -1.1299 | -3.2540 | 0.3420  |
| C  | -2.1873 | -3.7640 | -0.1322 | C  | -4.380575 | 0.034005  | -0.629109 | C  | -2.5379 | -3.5407 | -0.1619 |
| C  | 0.2009  | -4.4103 | 0.3870  | C  | -4.254890 | -2.311771 | 0.306809  | C  | -0.3547 | -4.5376 | 0.6076  |
| H  | -0.8525 | -2.7112 | 1.1796  | H  | -3.130285 | -1.550165 | -1.359440 | H  | -1.1921 | -2.6713 | 1.2710  |
| H  | -2.8806 | -2.9251 | -0.2285 | H  | -3.817400 | 0.823408  | -1.132924 | H  | -3.0791 | -2.6113 | -0.3508 |
| H  | -2.5661 | -4.4424 | 0.6366  | H  | -5.238175 | -0.232550 | -1.252525 | H  | -3.0927 | -4.1216 | 0.5792  |
| H  | -2.1534 | -4.2990 | -1.0849 | H  | -4.749134 | 0.425686  | 0.323057  | H  | -2.4929 | -4.1124 | -1.0929 |
| H  | 1.1904  | -4.0289 | 0.6506  | H  | -3.599695 | -3.173426 | 0.455612  | H  | 0.6227  | -4.3345 | 1.0524  |
| H  | 0.2826  | -4.9623 | -0.5530 | H  | -4.615453 | -1.973695 | 1.282333  | H  | -0.2078 | -5.0857 | -0.3272 |
| H  | -0.1224 | -5.0995 | 1.1711  | H  | -5.112575 | -2.630319 | -0.291192 | H  | -0.9105 | -5.1743 | 1.3003  |

**D**

|    |           |           |           |
|----|-----------|-----------|-----------|
| Ti | 0.057797  | -0.219898 | -0.021294 |
| N  | -2.017062 | -0.404372 | 0.313339  |
| C  | -2.872993 | -0.099810 | -0.726580 |
| C  | -2.763666 | -1.036475 | 1.246049  |
| C  | -4.168780 | -0.520527 | -0.427056 |
| C  | -4.095973 | -1.124268 | 0.837355  |
| H  | -2.319683 | -1.404393 | 2.158968  |
| H  | -5.037293 | -0.413118 | -1.060443 |
| H  | -4.902095 | -1.575596 | 1.395485  |
| N  | 0.064825  | -0.107695 | 2.084910  |
| C  | 1.219290  | -0.471456 | 2.746953  |
| C  | -0.725781 | 0.492913  | 3.002037  |
| C  | 1.136254  | -0.123917 | 4.094287  |
| C  | -0.111413 | 0.498603  | 4.255677  |
| H  | -1.693728 | 0.886751  | 2.729598  |
| H  | 1.895926  | -0.288843 | 4.844537  |
| H  | -0.527081 | 0.906770  | 5.164434  |
| C  | -2.272581 | 0.372683  | -1.924709 |
| H  | -2.881721 | 0.659188  | -2.783036 |
| C  | 2.284377  | -0.951037 | 1.937240  |
| H  | 3.214274  | -1.306954 | 2.382539  |
| C  | 3.080794  | -1.437199 | -0.223848 |
| C  | 3.393407  | -0.713782 | -1.377456 |
| C  | 3.689718  | -2.673744 | -0.000047 |
| C  | 4.320244  | -1.211999 | -2.284110 |
| H  | 2.908527  | 0.242129  | -1.545611 |
| C  | 4.615457  | -3.167968 | -0.913360 |
| H  | 3.410888  | -3.258201 | 0.870001  |
| C  | 4.935054  | -2.441458 | -2.056280 |
| H  | 4.567450  | -0.636025 | -3.168975 |
| H  | 5.078693  | -4.132140 | -0.736971 |
| H  | 5.653773  | -2.832203 | -2.766937 |
| C  | -0.288740 | 0.859173  | -3.103823 |
| C  | 0.860094  | 0.168320  | -3.499889 |
| C  | -0.681862 | 2.000774  | -3.808122 |
| C  | 1.598879  | 0.606429  | -4.590630 |
| H  | 1.161792  | -0.714802 | -2.948078 |
| C  | 0.065186  | 2.434581  | -4.898981 |
| H  | -1.551251 | 2.562150  | -3.483414 |
| C  | 1.206678  | 1.742894  | -5.293826 |
| H  | 2.481971  | 0.054682  | -4.892839 |
| H  | -0.240550 | 3.325637  | -5.435225 |
| H  | 1.787353  | 2.087796  | -6.141038 |
| N  | 2.114206  | -0.911189 | 0.658591  |
| N  | -0.981553 | 0.391588  | -1.966317 |
| O  | 0.789272  | 1.384822  | -0.268734 |
| O  | 0.205891  | -1.820644 | -0.832559 |
| C  | 1.426667  | 2.527181  | -0.786621 |
| C  | 2.672710  | 2.816037  | 0.039467  |
| C  | 0.444334  | 3.689345  | -0.764315 |
| H  | 1.712745  | 2.320011  | -1.827854 |
| H  | 3.353119  | 1.961666  | 0.029524  |
| H  | 3.200241  | 3.687184  | -0.357732 |
| H  | 2.390767  | 3.017642  | 1.076402  |
| H  | -0.465493 | 3.427704  | -1.308228 |
| H  | 0.174516  | 3.927899  | 0.268136  |
| H  | 0.886107  | 4.575469  | -1.227100 |
| C  | -0.292869 | -2.698382 | -1.817872 |
| C  | -1.479480 | -3.472756 | -1.261609 |
| C  | 0.842135  | -3.612740 | -2.259196 |
| H  | -0.631978 | -2.101425 | -2.675767 |
| H  | -2.285194 | -2.795047 | -0.968907 |
| H  | -1.865605 | -4.166453 | -2.013591 |
| H  | -1.173070 | -4.047206 | -0.382862 |
| H  | 1.704085  | -3.025967 | -2.591333 |
| H  | 1.161674  | -4.238634 | -1.421532 |
| H  | 0.521159  | -4.260809 | -3.079105 |

**E**

|    |           |           |           |
|----|-----------|-----------|-----------|
| Ti | -0.159192 | -0.527454 | 0.156698  |
| N  | -2.222323 | -0.035860 | 0.423591  |
| C  | -2.796037 | 0.395263  | -0.764435 |
| C  | -3.178313 | 0.086396  | 1.361464  |
| C  | -4.129077 | 0.767671  | -0.551100 |
| C  | -4.371454 | 0.573639  | 0.809036  |
| H  | -2.995004 | -0.167061 | 2.394359  |
| H  | -4.810384 | 1.141251  | -1.302027 |
| H  | -5.287884 | 0.759074  | 1.347951  |
| N  | 1.967416  | -0.906803 | 0.377884  |
| C  | 2.302863  | -1.126235 | 1.696964  |
| C  | 3.120230  | -0.752135 | -0.285576 |
| C  | 3.698989  | -1.123947 | 1.850793  |
| C  | 4.221748  | -0.880936 | 0.582651  |
| H  | 3.137210  | -0.552736 | -1.348058 |
| H  | 4.238539  | -1.283304 | 2.772992  |
| H  | 5.261839  | -0.814233 | 0.301823  |
| C  | -2.003044 | 0.467945  | -1.933735 |
| H  | -2.456427 | 0.804794  | -2.866735 |
| C  | 1.246739  | -1.324790 | 2.611070  |
| H  | 1.458192  | -1.613900 | 3.640935  |
| C  | -1.034981 | -1.610838 | 3.076164  |
| C  | -1.920265 | -2.597352 | 2.643477  |
| C  | -1.203749 | -1.011436 | 4.322862  |
| C  | -2.969935 | -2.989062 | 3.463592  |
| H  | -1.777679 | -3.027091 | 1.658185  |
| C  | -2.261667 | -1.406778 | 5.137058  |
| H  | -0.527584 | -0.222609 | 4.633543  |
| C  | -3.145777 | -2.393297 | 4.711014  |
| H  | -3.657715 | -3.754787 | 3.123818  |
| H  | -2.399958 | -0.932881 | 6.102155  |
| H  | -3.971587 | -2.693172 | 5.345215  |
| C  | 0.099133  | 0.253868  | -2.996523 |
| C  | 1.129017  | -0.679683 | -3.146415 |
| C  | -0.026132 | 1.293713  | -3.924577 |
| C  | 2.004115  | -0.590476 | -4.221829 |
| H  | 1.226489  | -1.478304 | -2.417871 |
| C  | 0.851750  | 1.372992  | -4.998824 |
| H  | -0.790210 | 2.051273  | -3.791898 |
| C  | 1.867385  | 0.433336  | -5.154887 |
| H  | 2.793400  | -1.325696 | -4.330807 |
| H  | 0.749732  | 2.183508  | -5.711212 |
| H  | 2.552272  | 0.504742  | -5.991152 |
| N  | 0.013419  | -1.221981 | 2.199314  |
| N  | -0.750993 | 0.131929  | -1.878531 |
| O  | 0.337244  | 1.196414  | 0.351565  |
| O  | -0.450697 | -2.180209 | -0.529434 |
| C  | 1.203945  | 2.148359  | -0.223227 |
| C  | 2.254543  | 2.542788  | 0.805198  |
| C  | 0.388523  | 3.337319  | -0.710090 |
| H  | 1.708458  | 1.686052  | -1.084830 |
| H  | 2.813661  | 1.663727  | 1.135635  |
| H  | 2.958899  | 3.263168  | 0.380147  |
| H  | 1.770910  | 2.998060  | 1.674000  |
| H  | -0.374504 | 3.008163  | -1.419196 |
| H  | -0.113485 | 3.818447  | 0.133748  |
| H  | 1.030891  | 4.071493  | -1.203516 |
| C  | -0.940989 | -2.995925 | -1.563269 |
| C  | -2.347293 | -3.466193 | -1.211021 |
| C  | 0.012650  | -4.162416 | -1.781883 |
| H  | -0.992935 | -2.395792 | -2.483099 |
| H  | -2.982956 | -2.613203 | -0.959237 |
| H  | -2.795616 | -4.000743 | -2.052772 |
| H  | -2.316279 | -4.144809 | -0.353559 |
| H  | 1.017081  | -3.805273 | -2.021473 |
| H  | 0.075397  | -4.765637 | -0.872114 |
| H  | -0.333913 | -4.798184 | -2.600887 |

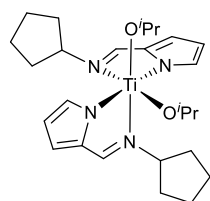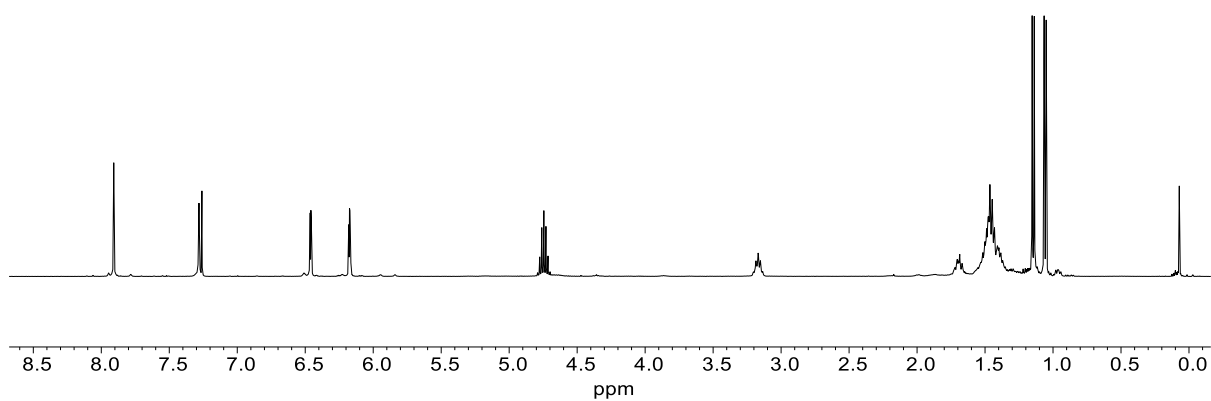

**Fig. S6**  $^1\text{H}$  NMR spectrum of **2** in  $\text{CDCl}_3$  at 298 K.

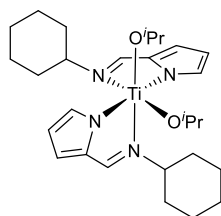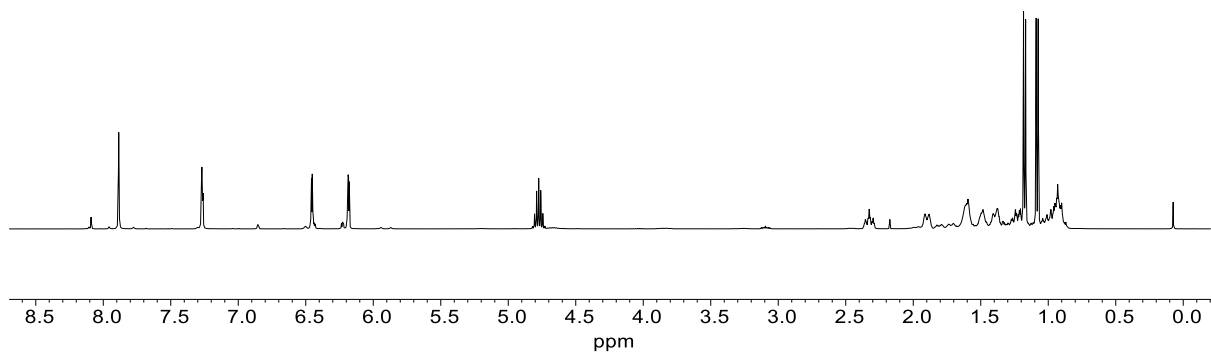

**Fig. S7**  $^1\text{H}$  NMR spectrum of **3** in  $\text{CDCl}_3$  at 298 K.

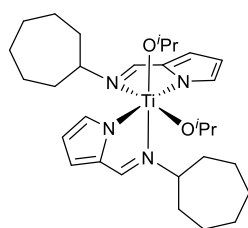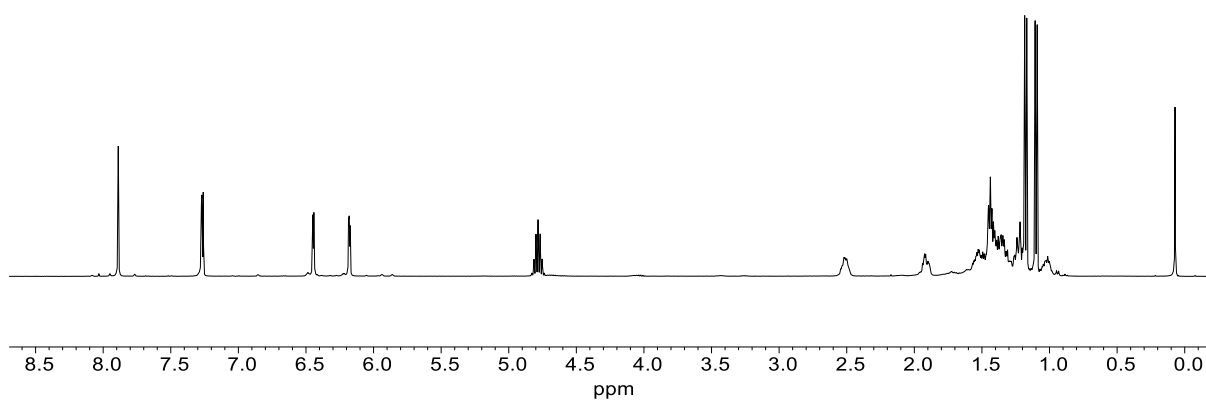

**Fig. S8**  $^1\text{H}$  NMR spectrum of **4** in  $\text{CDCl}_3$  at 298 K.

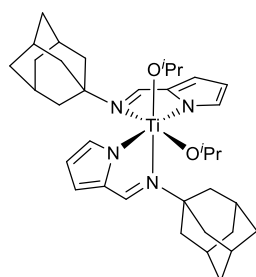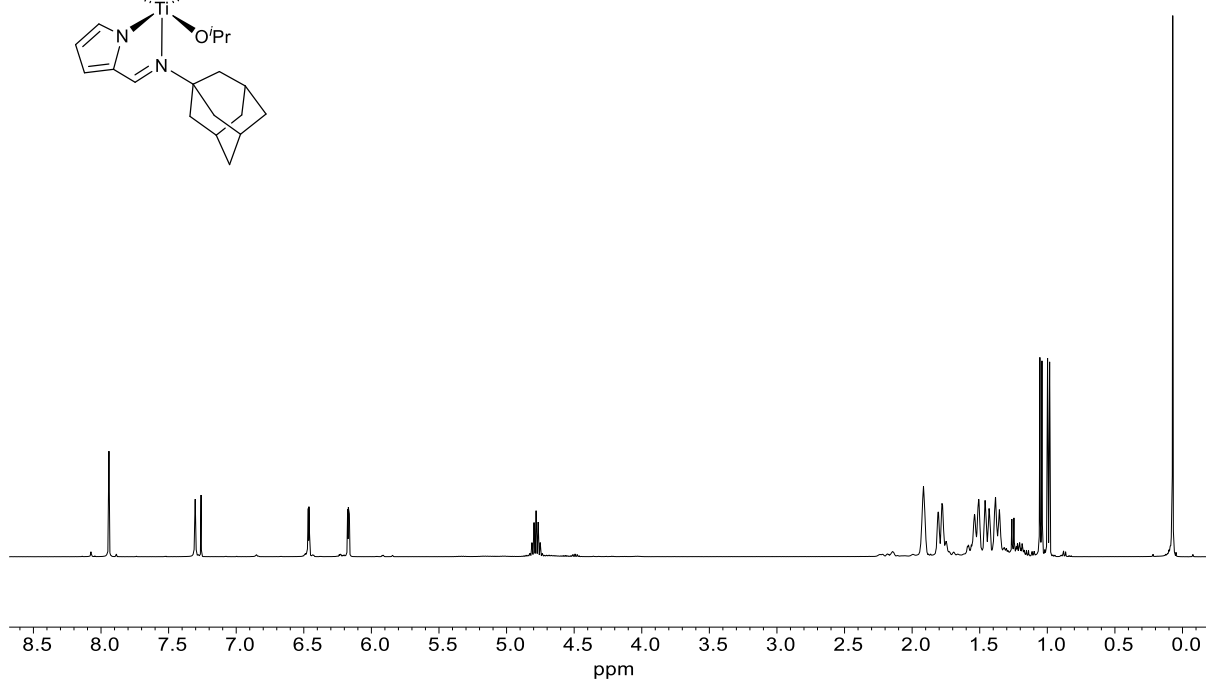

**Fig. S9**  $^1\text{H}$  NMR spectrum of **5** in  $\text{CDCl}_3$  at 298 K.



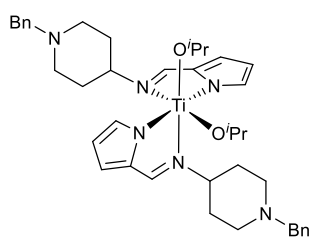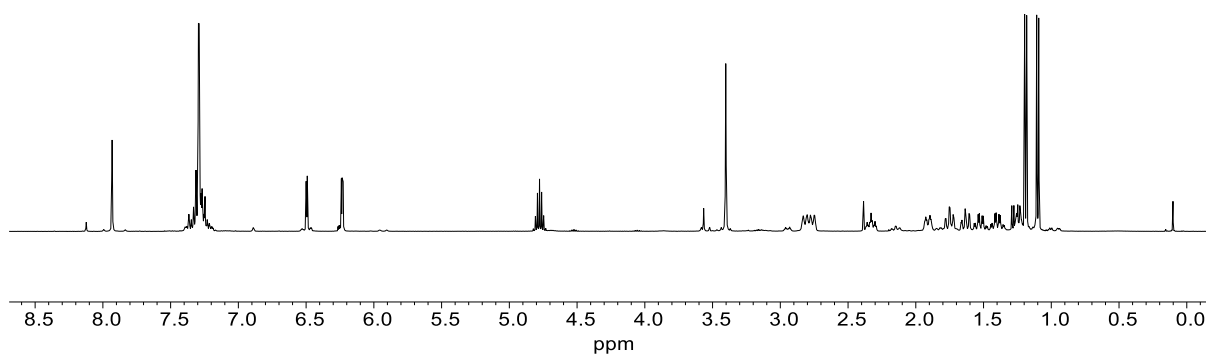

**Fig. S10** <sup>1</sup>H NMR spectrum of **6** in CDCl<sub>3</sub> at 298 K.

**Table S1** Crystal data and structure refinement for the complex **2**.

---

|                                                     |                                                                              |
|-----------------------------------------------------|------------------------------------------------------------------------------|
| Empirical formula                                   | C <sub>26</sub> H <sub>40</sub> N <sub>4</sub> O <sub>2</sub> Ti             |
| Formula weight                                      | 488.52                                                                       |
| Temperature/K                                       | 100                                                                          |
| Crystal system                                      | monoclinic                                                                   |
| Space group                                         | P2 <sub>1</sub> /c                                                           |
| <i>a</i> /Å                                         | 8.9560(9)                                                                    |
| <i>b</i> /Å                                         | 16.7630(17)                                                                  |
| <i>c</i> /Å                                         | 18.1781(19)                                                                  |
| <i>α</i> /°                                         | 90                                                                           |
| <i>β</i> /°                                         | 75.196(3)                                                                    |
| <i>γ</i> /°                                         | 90                                                                           |
| Volume/Å <sup>3</sup>                               | 2638.5(5)                                                                    |
| <i>Z</i>                                            | 4                                                                            |
| $\rho_{\text{calc}}/\text{cm}^3$                    | 1.230                                                                        |
| $\mu/\text{mm}^{-1}$                                | 2.966                                                                        |
| <i>F</i> (000)                                      | 1048.0                                                                       |
| Crystal size/mm <sup>3</sup>                        | 0.04 × 0.02 × 0.02                                                           |
| Radiation                                           | CuK $\alpha$ ( $\lambda$ = 1.54178)                                          |
| 2 $\theta$ range for data collection/°              | 7.288 to 137.29                                                              |
| Index ranges                                        | -10 ≤ <i>h</i> ≤ 10, -20 ≤ <i>k</i> ≤ 20, -21 ≤ <i>l</i> ≤ 21                |
| Reflections collected                               | 42047                                                                        |
| Independent reflections                             | 4688 [ <i>R</i> <sub>int</sub> = 0.0705, <i>R</i> <sub>sigma</sub> = 0.0426] |
| Data/restraints/parameters                          | 4688/144/357                                                                 |
| Goodness-of-fit on <i>F</i> <sup>2</sup>            | 1.219                                                                        |
| Final <i>R</i> indexes [ <i>I</i> ≥ 2σ( <i>I</i> )] | <i>R</i> <sub>1</sub> = 0.1454, w <i>R</i> <sub>2</sub> = 0.3409             |
| Final <i>R</i> indexes [all data]                   | <i>R</i> <sub>1</sub> = 0.1465, w <i>R</i> <sub>2</sub> = 0.3410             |
| Largest diff. peak/hole / e Å <sup>-3</sup>         | 0.73/-0.58                                                                   |

---

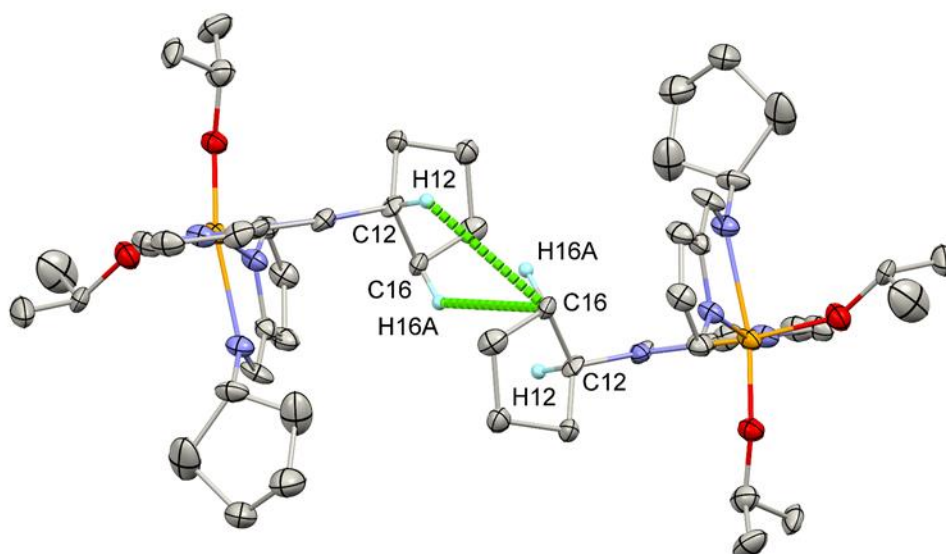

**Fig. S11** A view of the C–H...C interactions (C16–H16A...C16 and C12–H12...C16) forming between two cyclopentyl moieties representing weak Van der Waals forces between molecules of **2**.

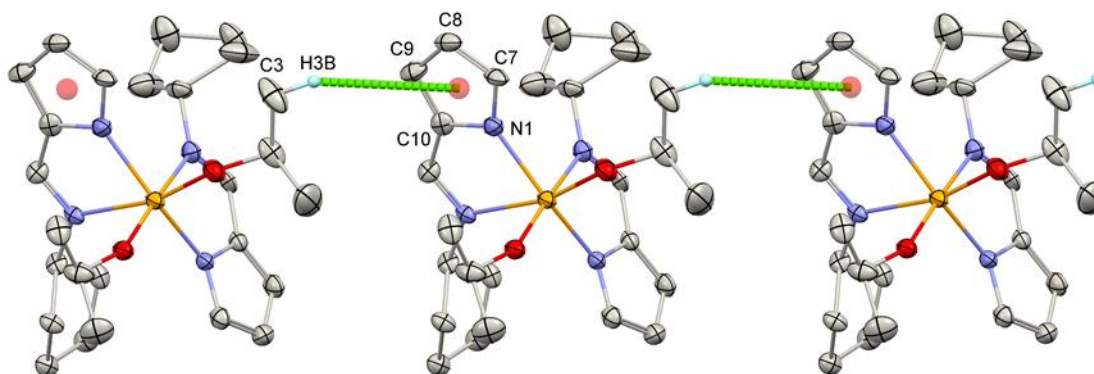

**Fig. S12** A view of the chain of the molecules of **2** related by a translational symmetry illustrating the C–H...C<sub>g</sub> interactions (C3–H3B...C<sub>g</sub>). Note that, C<sub>g</sub> is the centroid of the pyrrole ring (N1 and C7 to C10).

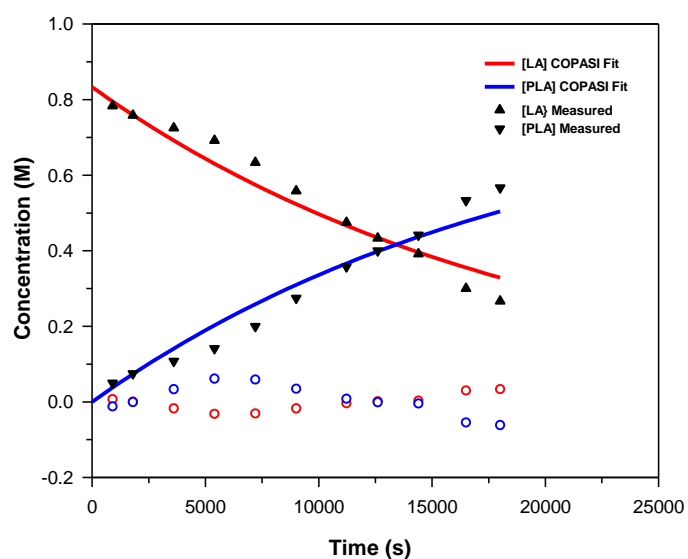

**Fig. S13** Concentration versus time profile for the  $^1\text{H}$  NMR resonance decay of *rac*-LA ( $\blacktriangle$ ) and the growth of PLA ( $\blacktriangledown$ ) for the ROP of *rac*-LA by complex **2** at 70 °C along with the fits (blue and red lines) and errors determined by COPASI.

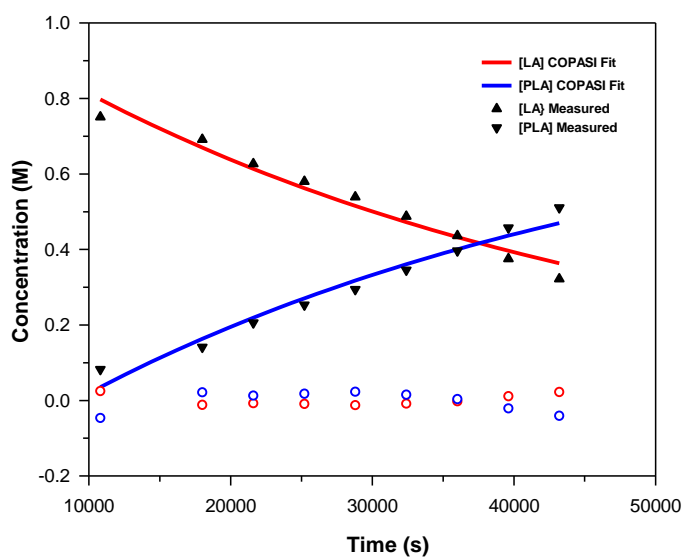

**Fig. S14** Concentration versus time profile for the  $^1\text{H}$  NMR resonance decay of *rac*-LA ( $\blacktriangle$ ) and the growth of PLA ( $\blacktriangledown$ ) for the ROP of *rac*-LA by complex **3** at 70 °C along with the fits (blue and red lines) and errors determined by COPASI.

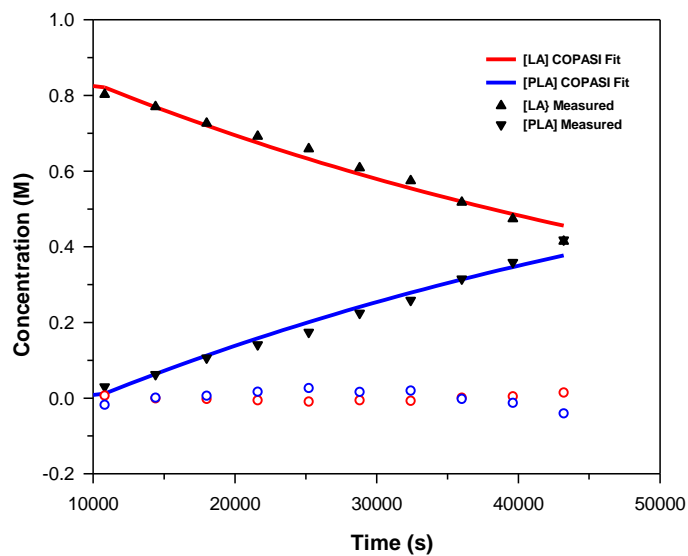

**Fig. S15** Concentration versus time profile for the  $^1\text{H}$  NMR resonance decay of *rac*-LA (▲) and the growth of PLA (▼) for the ROP of *rac*-LA by complex **4** at 70 °C along with the fits (blue and red lines) and errors determined by COPASI.

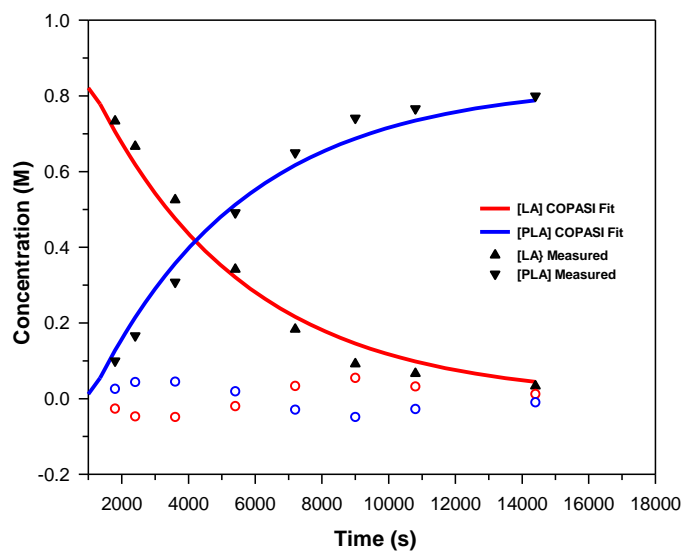

**Fig. S16** Concentration versus time profile for the  $^1\text{H}$  NMR resonance decay of *rac*-LA (▲) and the growth of PLA (▼) for the ROP of *rac*-LA by complex **5** at 70 °C along with the fits (blue and red lines) and errors determined by COPASI.

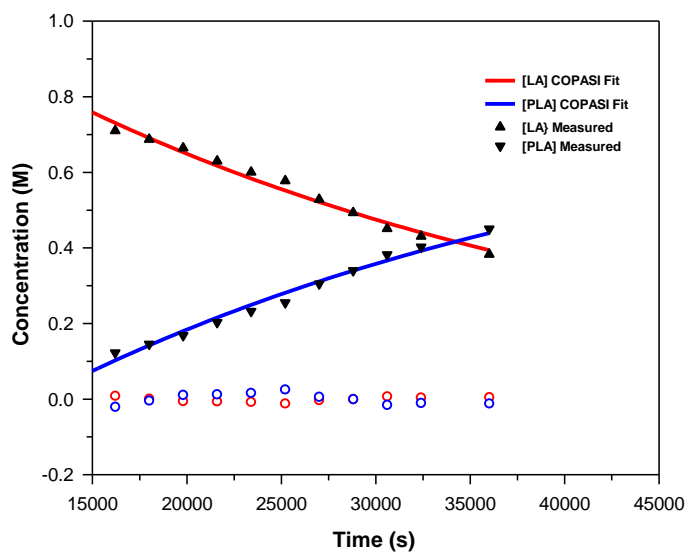

**Fig. S17** Concentration versus time profile for the  $^1\text{H}$  NMR resonance decay of *rac*-LA ( $\blacktriangle$ ) and the growth of PLA ( $\blacktriangledown$ ) for the ROP of *rac*-LA by complex **6** at 70 °C along with the fits (blue and red lines) and errors determined by COPASI.

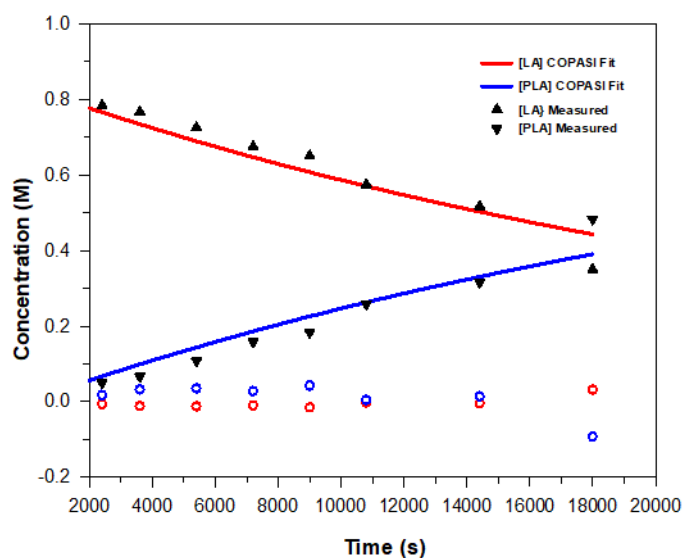

**Fig. S18** Concentration versus time profile for the  $^1\text{H}$  NMR resonance decay of *rac*-LA ( $\blacktriangle$ ) and the growth of PLA ( $\blacktriangledown$ ) for the ROP of *rac*-LA by complex **1** at 100 °C along with the fits (blue and red lines) and errors determined by COPASI.

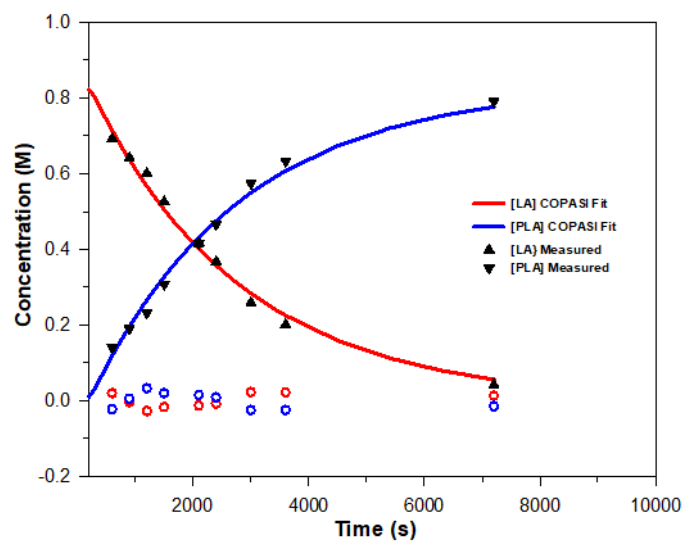

**Fig. S19** Concentration versus time profile for the  $^1\text{H}$  NMR resonance decay of *rac*-LA ( $\blacktriangle$ ) and the growth of PLA ( $\blacktriangledown$ ) for the ROP of *rac*-LA by complex **2** at 100 °C along with the fits (blue and red lines) and errors determined by COPASI.

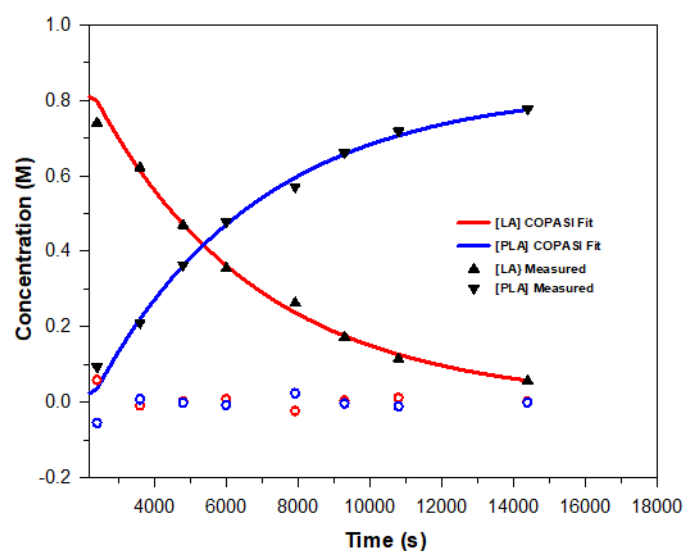

**Fig. S20** Concentration versus time profile for the  $^1\text{H}$  NMR resonance decay of *rac*-LA ( $\blacktriangle$ ) and the growth of PLA ( $\blacktriangledown$ ) for the ROP of *rac*-LA by complex **3** at 100 °C along with the fits (blue and red lines) and errors determined by COPASI.

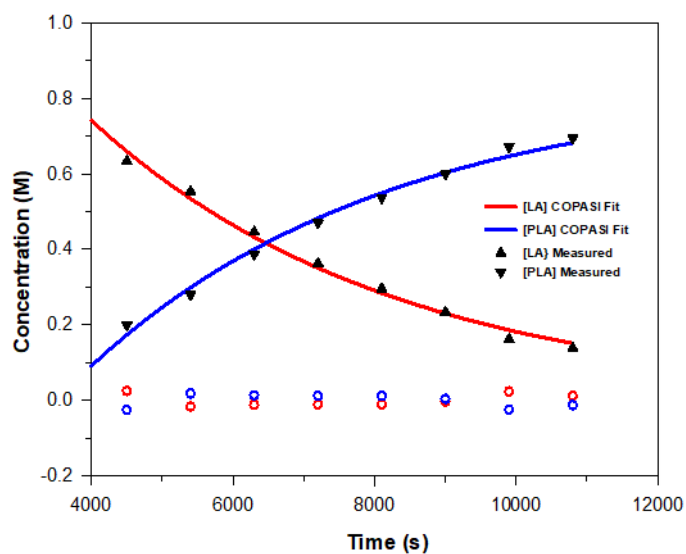

**Fig. S21** Concentration versus time profile for the  $^1\text{H}$  NMR resonance decay of *rac*-LA ( $\blacktriangle$ ) and the growth of PLA ( $\blacktriangledown$ ) for the ROP of *rac*-LA by complex **4** at 100 °C along with the fits (blue and red lines) and errors determined by COPASI.

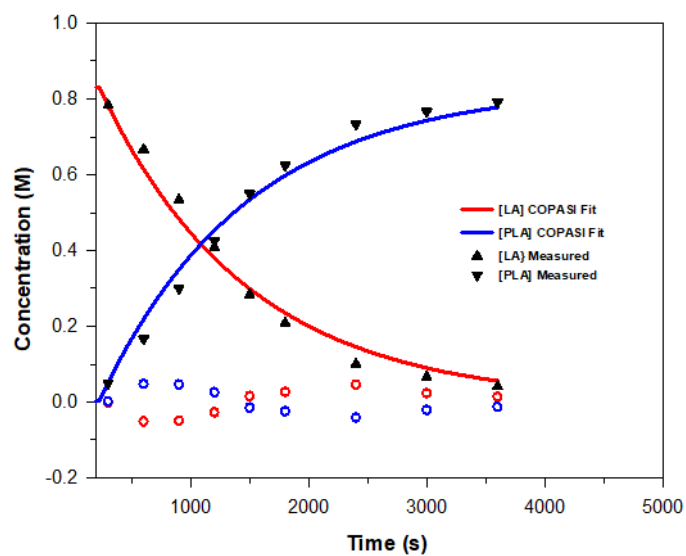

**Fig. S22** Concentration versus time profile for the  $^1\text{H}$  NMR resonance decay of *rac*-LA ( $\blacktriangle$ ) and the growth of PLA ( $\blacktriangledown$ ) for the ROP of *rac*-LA by complex **5** at 100 °C along with the fits (blue and red lines) and errors determined by COPASI.



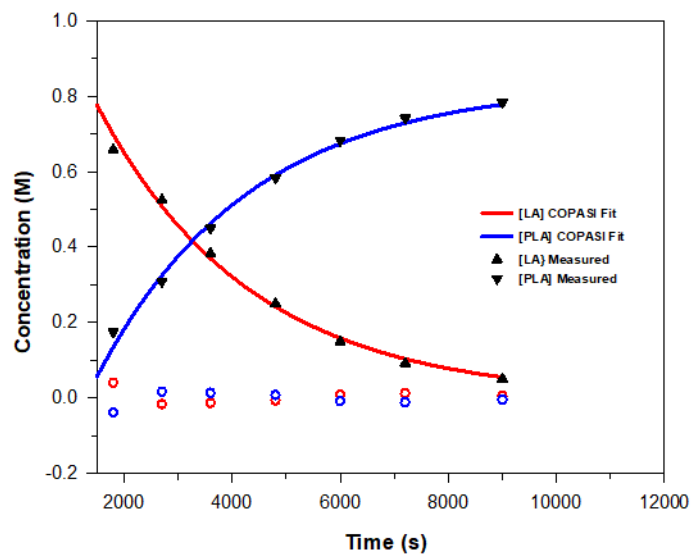

**Fig. S23** Concentration versus time profile for the  $^1\text{H}$  NMR resonance decay of *rac*-LA (▲) and the growth of PLA (▼) for the ROP of *rac*-LA by complex **6** at 100 °C along with the fits (blue and red lines) and errors determined by COPASI.

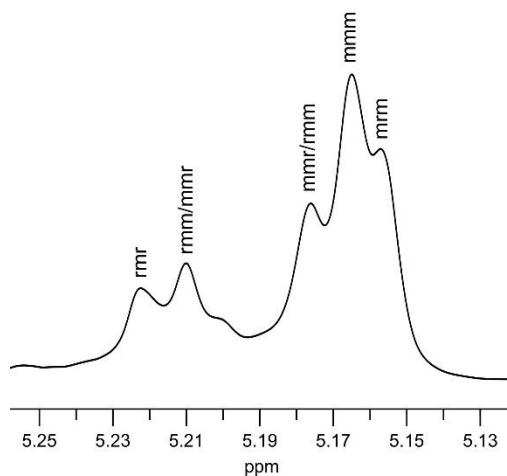

**Fig. S24** Homonuclear decoupled  $^1\text{H}$  NMR spectrum of the methine region of the PLA prepared from *rac*-LA at 70 °C in toluene (400 MHz,  $\text{CDCl}_3$ ) using complex **1**.

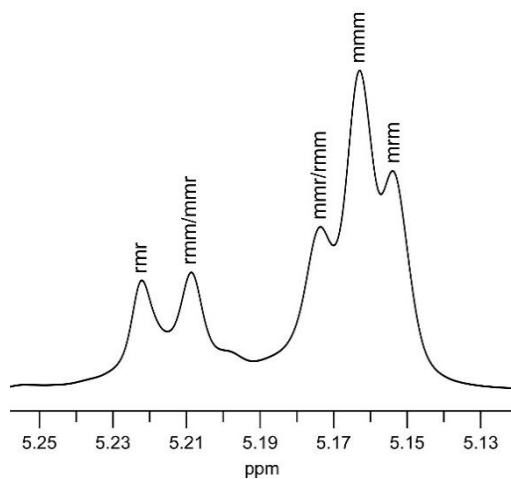

**Fig. S25** Homonuclear decoupled  $^1\text{H}$  NMR spectrum of the methine region of the PLA prepared from *rac*-LA at 70 °C in toluene (400 MHz,  $\text{CDCl}_3$ ) using complex **2**.

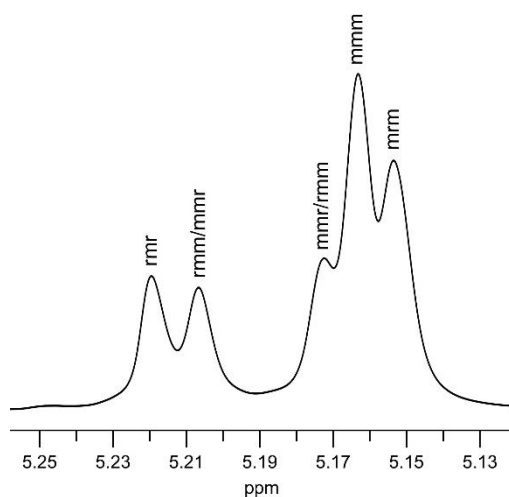

**Fig. S26** Homonuclear decoupled  $^1\text{H}$  NMR spectrum of the methine region of the PLA prepared from *rac*-LA at 70 °C in toluene (400 MHz,  $\text{CDCl}_3$ ) using complex **3**.

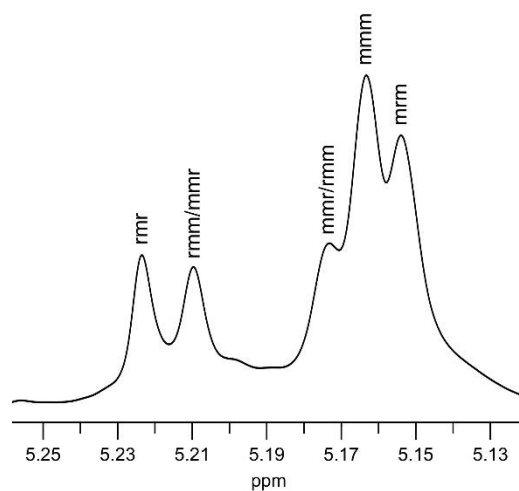

**Fig. S27** Homonuclear decoupled  $^1\text{H}$  NMR spectrum of the methine region of the PLA prepared from *rac*-LA at 70 °C in toluene (400 MHz,  $\text{CDCl}_3$ ) using complex **4**.

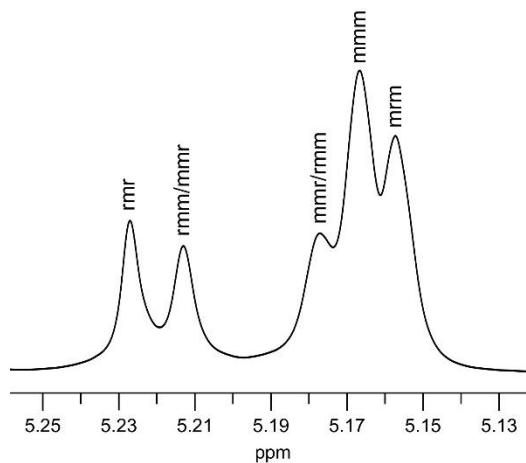

**Fig. S28** Homonuclear decoupled  $^1\text{H}$  NMR spectrum of the methine region of the PLA prepared from *rac*-LA at 70 °C in toluene (400 MHz,  $\text{CDCl}_3$ ) using complex **5**.

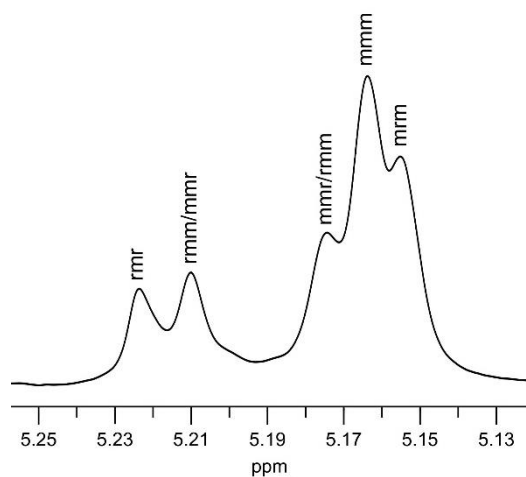

**Fig. S29** Homonuclear decoupled  $^1\text{H}$  NMR spectrum of the methine region of the PLA prepared from *rac*-LA at 70 °C in toluene (400 MHz,  $\text{CDCl}_3$ ) using complex **6**.

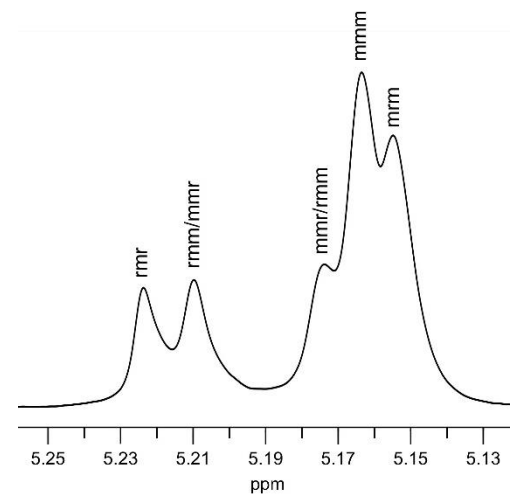

**Fig. S30** Homonuclear decoupled  $^1\text{H}$  NMR spectrum of the methine region of the PLA prepared from *rac*-LA at 100 °C in toluene (400 MHz,  $\text{CDCl}_3$ ) using complex **1**.

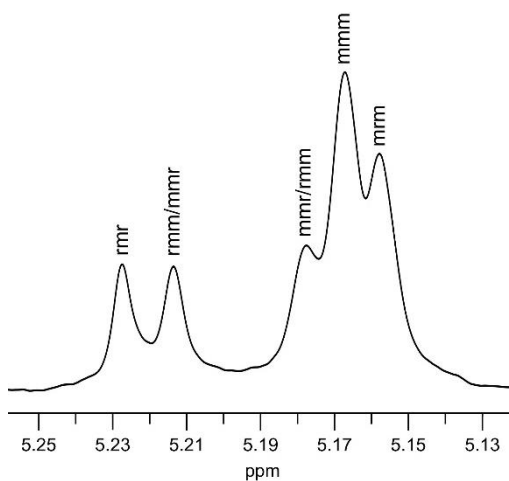

**Fig. S31** Homonuclear decoupled  $^1\text{H}$  NMR spectrum of the methine region of the PLA prepared from *rac*-LA at 100 °C in toluene (400 MHz,  $\text{CDCl}_3$ ) using complex **2**.

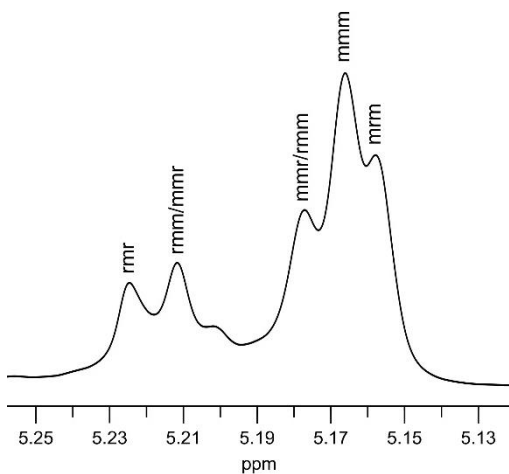

**Fig. S32** Homonuclear decoupled  $^1\text{H}$  NMR spectrum of the methine region of the PLA prepared from *rac*-LA at 100 °C in toluene (400 MHz,  $\text{CDCl}_3$ ) using complex **3**.

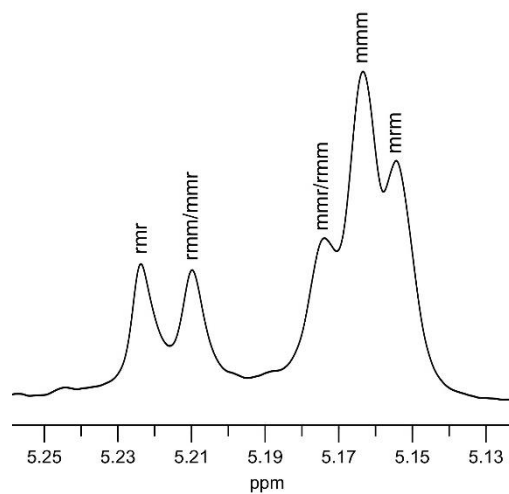

**Fig. S33** Homonuclear decoupled  $^1\text{H}$  NMR spectrum of the methine region of the PLA prepared from *rac*-LA at 100 °C in toluene (400 MHz,  $\text{CDCl}_3$ ) using complex **4**.

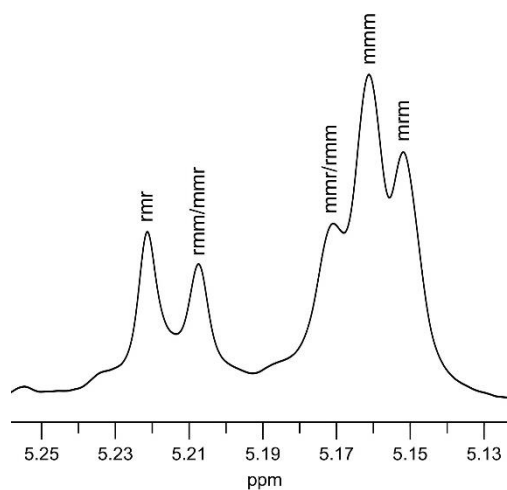

**Fig. S34** Homonuclear decoupled  $^1\text{H}$  NMR spectrum of the methine region of the PLA prepared from *rac*-LA at 100 °C in toluene (400 MHz,  $\text{CDCl}_3$ ) using complex **5**.

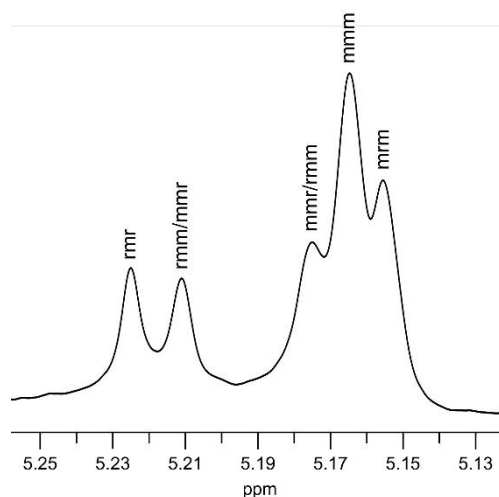

**Fig. S35** Homonuclear decoupled  $^1\text{H}$  NMR spectrum of the methine region of the PLA prepared from *rac*-LA at 100 °C in toluene (400 MHz,  $\text{CDCl}_3$ ) using complex **6**.

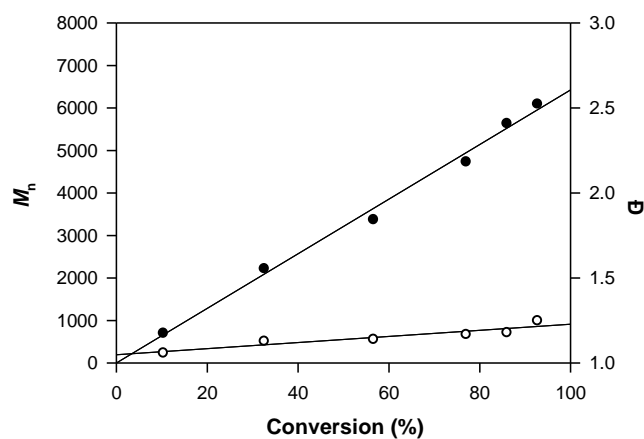

**Fig. S36** Plot of PCL  $M_n$  (●) (versus polystyrene standards) and PDI (○) as a function of monomer conversion for a  $\epsilon$ -CL polymerisation using **5** ( $[\epsilon\text{-CL}]_0/[\text{Ti}] = 100$ , toluene, 70 °C).

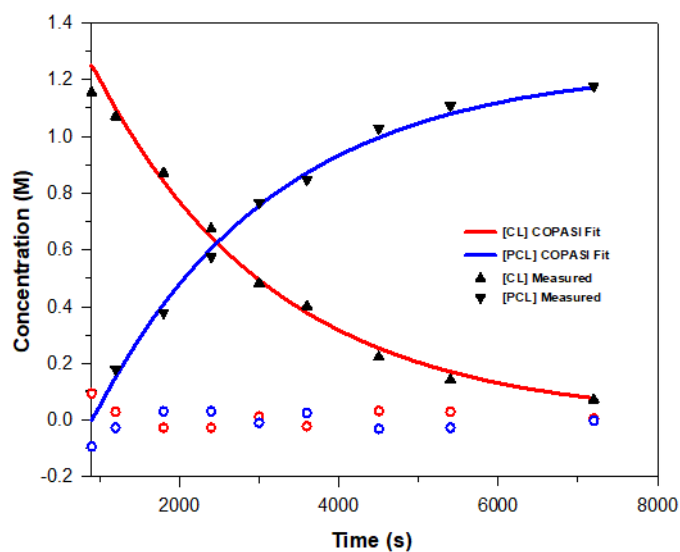

**Fig. S37** Concentration versus time profile for the  $^1\text{H}$  NMR resonance decay of  $\epsilon$ -CL ( $\blacktriangle$ ) and the growth of PCL ( $\blacktriangledown$ ) for the ROP of  $\epsilon$ -CL by complex **1** at 70 °C along with the fits (blue and red lines) and errors determined by COPASI.

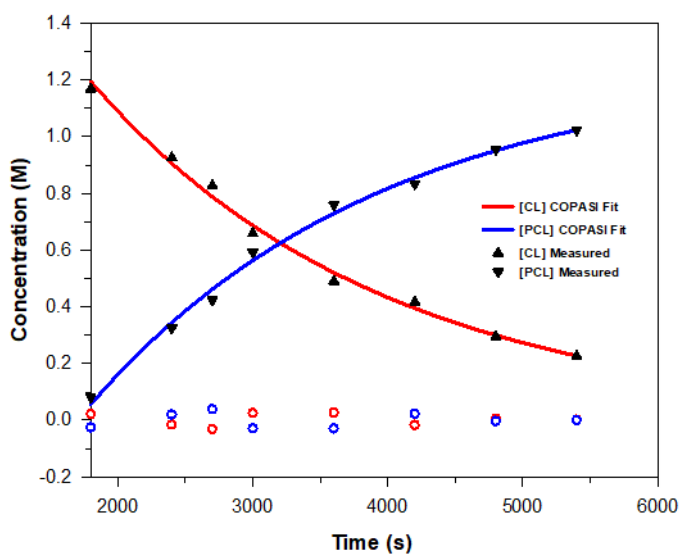

**Fig. S38** Concentration versus time profile for the  $^1\text{H}$  NMR resonance decay of  $\epsilon$ -CL ( $\blacktriangle$ ) and the growth of PCL ( $\blacktriangledown$ ) for the ROP of  $\epsilon$ -CL by complex **2** at 70 °C along with the fits (blue and red lines) and errors determined by COPASI.

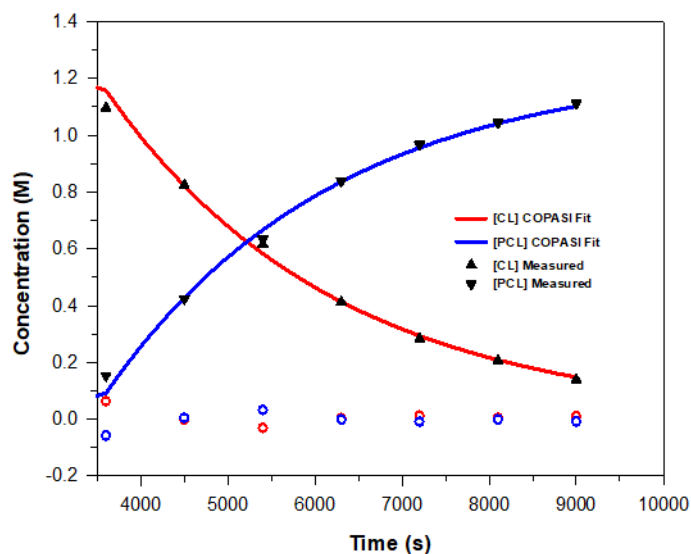

**Fig. S39** Concentration versus time profile for the  $^1\text{H}$  NMR resonance decay of  $\epsilon\text{-CL}$  ( $\blacktriangle$ ) and the growth of PCL ( $\blacktriangledown$ ) for the ROP of  $\epsilon\text{-CL}$  by complex **3** at  $70^\circ\text{C}$  along with the fits (blue and red lines) and errors determined by COPASI.

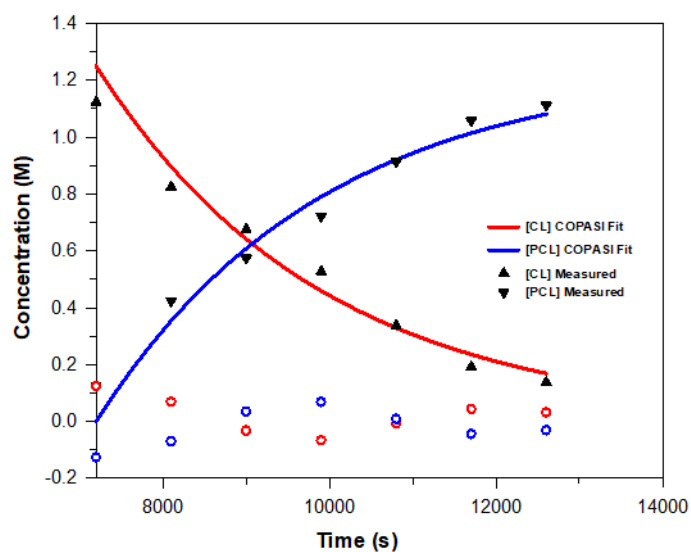

**Fig. S40** Concentration versus time profile for the  $^1\text{H}$  NMR resonance decay of  $\epsilon\text{-CL}$  ( $\blacktriangle$ ) and the growth of PCL ( $\blacktriangledown$ ) for the ROP of  $\epsilon\text{-CL}$  by complex **4** at  $70^\circ\text{C}$  along with the fits (blue and red lines) and errors determined by COPASI.

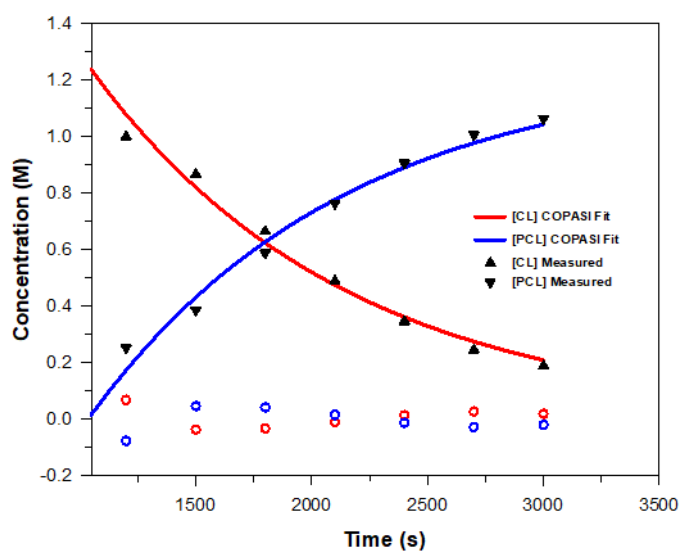

**Fig. S41** Concentration versus time profile for the  $^1\text{H}$  NMR resonance decay of  $\epsilon\text{-CL}$  (▲) and the growth of PCL (▼) for the ROP of  $\epsilon\text{-CL}$  by complex **5** at  $70^\circ\text{C}$  along with the fits (blue and red lines) and errors determined by COPASI.

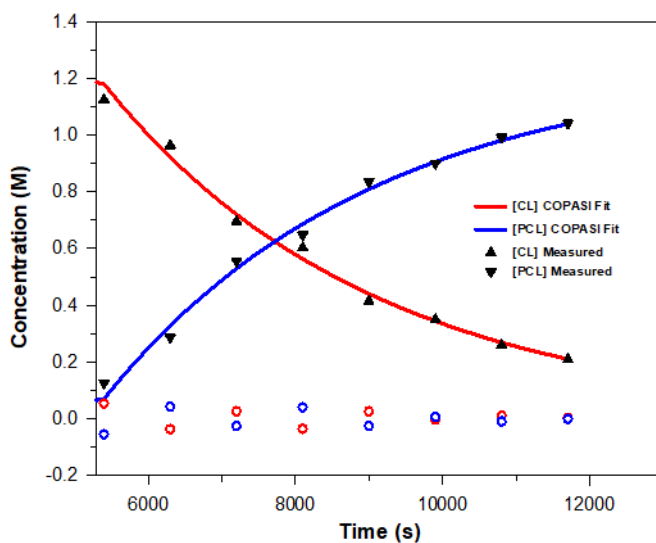

**Fig. S42** Concentration versus time profile for the  $^1\text{H}$  NMR resonance decay of  $\epsilon\text{-CL}$  (▲) and the growth of PCL (▼) for the ROP of  $\epsilon\text{-CL}$  by complex **6** at  $70^\circ\text{C}$  along with the fits (blue and red lines) and errors determined by COPASI.



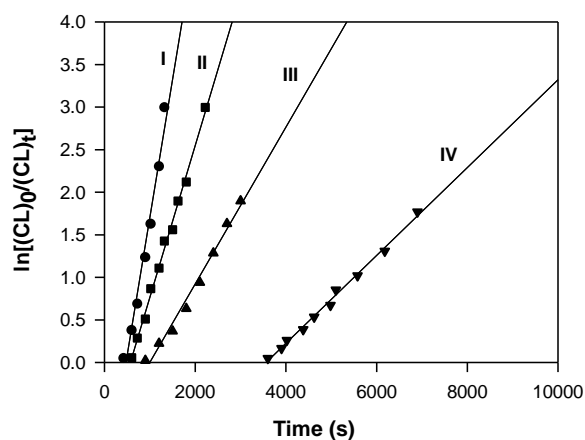

**Fig. S43** Semilogarithmic plots of  $\ln[\text{CL}]_0/[\text{CL}]_t$  versus time for  $\epsilon$ -CL polymerization using complex **5** as an initiator at different temperatures in toluene ( $[\epsilon\text{-CL}]_0/[\text{Ti}] = 100$ ,  $[\epsilon\text{-CL}]_0 = 1.25 \text{ M}$ . **I**:  $T = 90 \text{ }^\circ\text{C}$ ,  $k_{\text{app}} = (32.32 \pm 0.26) \times 10^{-4} \text{ s}^{-1}$ ; **II**:  $T = 80 \text{ }^\circ\text{C}$ ,  $k_{\text{app}} = (18.71 \pm 0.13) \times 10^{-4} \text{ s}^{-1}$ ; **III**:  $T = 70 \text{ }^\circ\text{C}$ ,  $k_{\text{app}} = (9.12 \pm 0.68) \times 10^{-4} \text{ s}^{-1}$ ; **IV**:  $T = 60 \text{ }^\circ\text{C}$ ,  $k_{\text{app}} = (32.32 \pm 0.26) \times 10^{-4} \text{ s}^{-1}$ ).

**Table S2** Kinetic data for the  $\epsilon$ -CL polymerizations using complex **5**.

| T (°C) | T (K) | 1/T (K <sup>-1</sup> ) | $k_{\text{app}}$ (10 <sup>4</sup> s <sup>-1</sup> ) | $k_{\text{p}}$ | $\ln(k_{\text{p}}/T)$ |
|--------|-------|------------------------|-----------------------------------------------------|----------------|-----------------------|
| 60     | 333   | 0.003003               | $5.04 \pm 0.22$                                     | 0.040316       | -9.01915              |
| 70     | 343   | 0.002915               | $9.12 \pm 0.68$                                     | 0.073680       | -8.44575              |
| 80     | 353   | 0.002833               | $18.71 \pm 0.13$                                    | 0.149675       | -7.76576              |
| 90     | 363   | 0.002755               | $32.32 \pm 0.26$                                    | 0.258578       | -7.24696              |
